# Supplementary material for: Rhamnogalacturonan-I Based Microcapsules for Targeted Drug Release
Source: PubMed Central journal article supplement (PMC5167381; doi:10.1371/journal.pone.0168050), 2016-12-19
Supplement: pone.0168050.s002.pdf [file pone.0168050.s002.pdf]

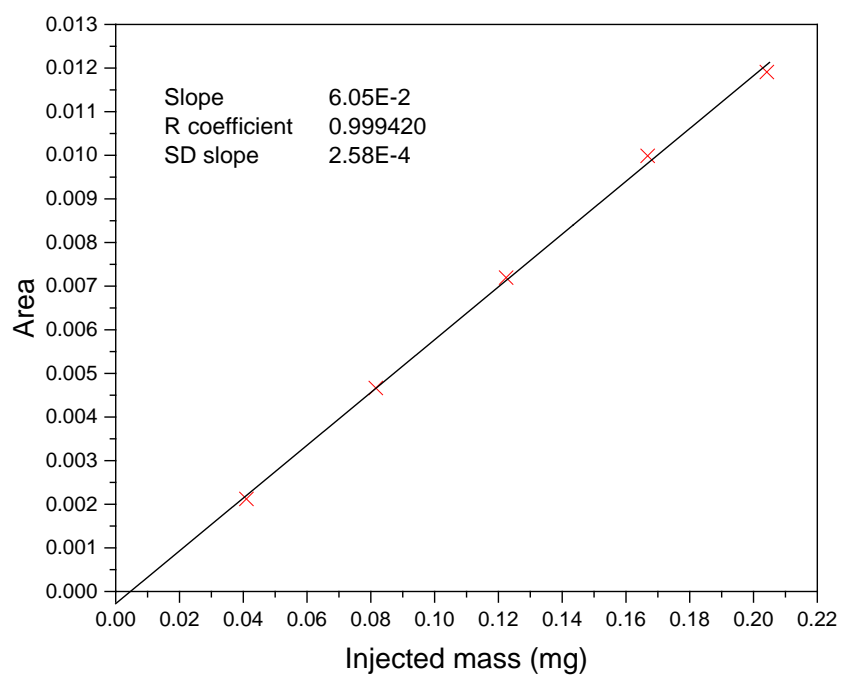

**Figure S2. RI peak area plotted vs. the injected mass for five different concentrations of Rhamnogalacturonan-I.** The  $dn/dc$  can be obtained from the slope, which depends on the RI detector constant and the  $dn/dc$ .
