# Supplementary material for: Rhamnogalacturonan-I Based Microcapsules for Targeted Drug Release
Source: PubMed Central journal article supplement (PMC5167381; doi:10.1371/journal.pone.0168050), 2016-12-19
Supplement: pone.0168050.s003.pdf [file pone.0168050.s003.pdf]

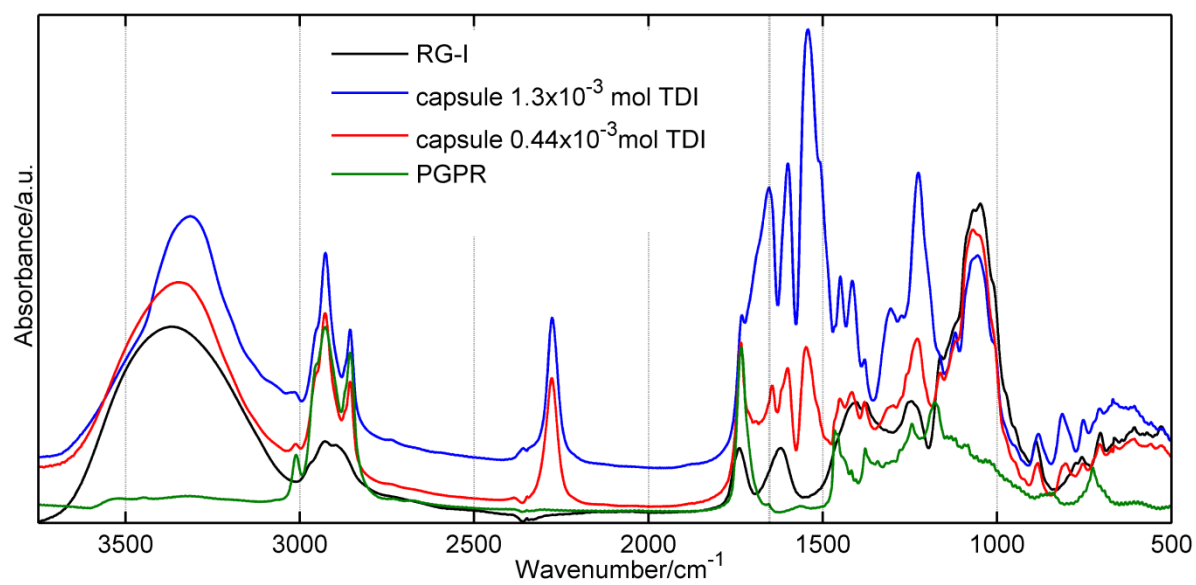

**Figure S3. FTIR data including the surfactant PGPR.**
